# Supplementary material for: The Impact of Dietary Factors during Pregnancy on the Development of Islet Autoimmunity and Type 1 Diabetes: A Systematic Literature Review
Source: MDPI journal article supplement (doi:10.3390/nu15204333), 2023-10-11
Supplement: s1 [file s1]

**Table S1**

|                      |                                                                                                                                                                                                                                                                      |
|----------------------|----------------------------------------------------------------------------------------------------------------------------------------------------------------------------------------------------------------------------------------------------------------------|
| <b>Data<br/>base</b> | <b>Advanced search string</b>                                                                                                                                                                                                                                        |
| <b>Scopus</b>        | TITLE-ABS-KEY (("type 1 diabetes" OR "type I diabetes" ) AND "prenatal" AND ( diet OR "islet autoimmunity" OR "animal*" OR "mouse" OR "mice" OR "nutrient" OR "gluten" OR "gliadin" OR "vitamins" OR "milk" OR "fibres" ) ) AND ( LIMIT-TO ( LANGUAGE , "English" )) |
| <b>PubMed</b>        | TITLE-ABS ((type 1 diabetes OR type I diabetes) AND prenatal AND (diet OR "islet autoimmunity" OR animal* OR mouse OR mice OR nutrient OR gluten OR gliadin OR vitamins OR milk OR fibres))                                                                          |
