# Supplementary material for: The Impact of Dietary Factors during Pregnancy on the Development of Islet Autoimmunity and Type 1 Diabetes: A Systematic Literature Review
Source: MDPI journal article supplement (doi:10.3390/nu15204333), 2023-10-11

PRISMA 2020 flow diagram for updated systematic reviews which included searches of databases, registers and other sources

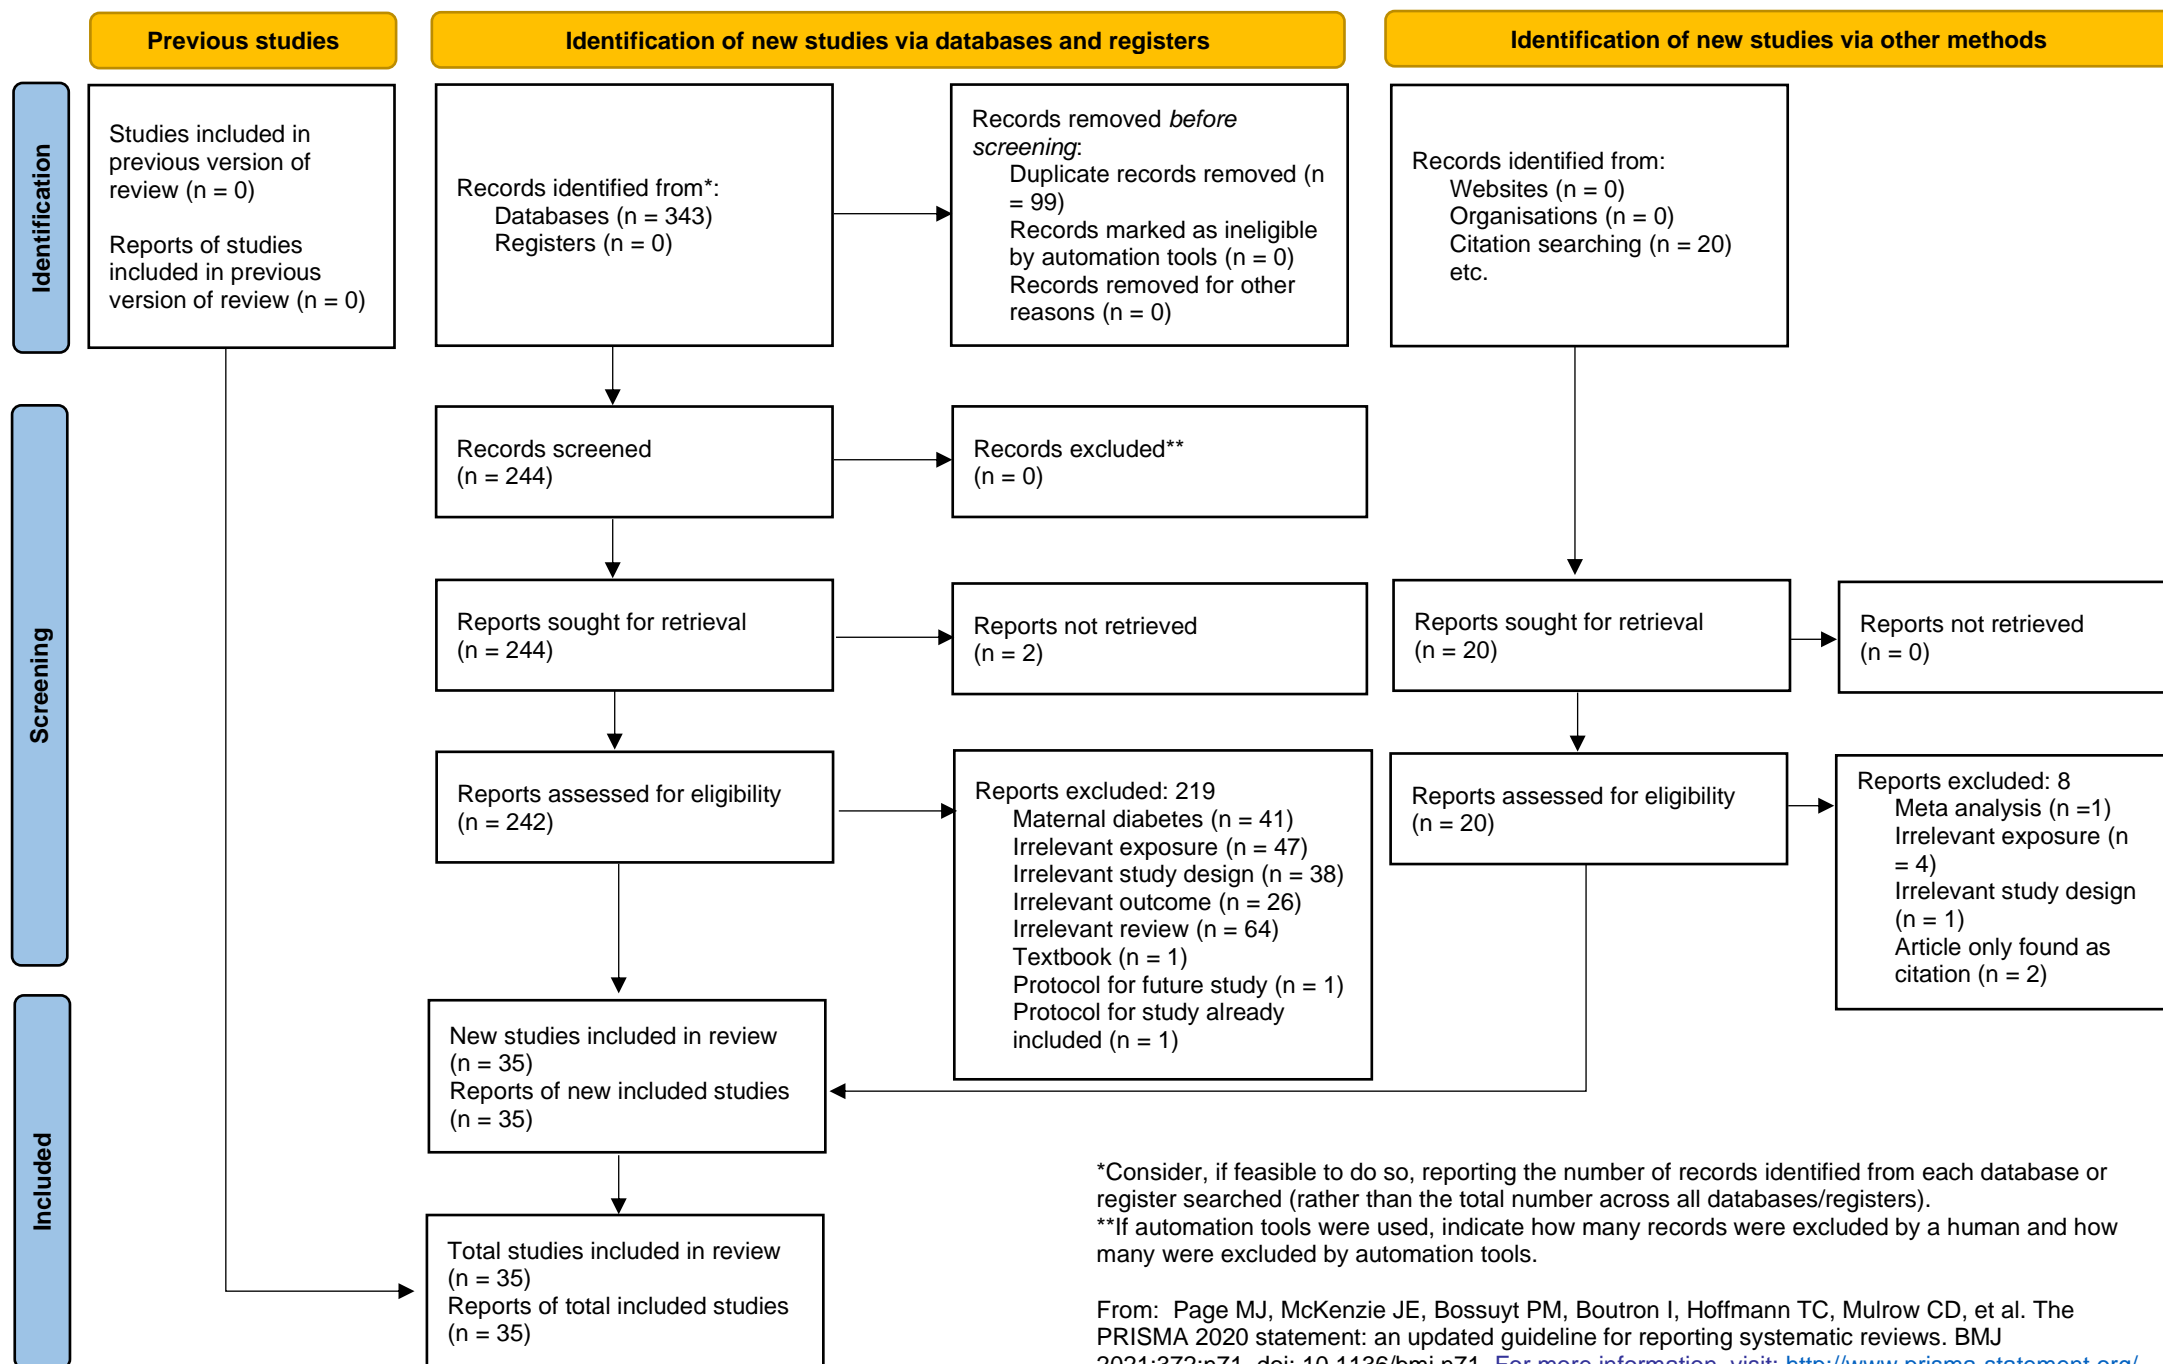

Supplement: s1 [file s1]
